# Supplementary figures and images for: Expansion and Functional Divergence of Inositol Polyphosphate 5-Phosphatases in Angiosperms
Source: MDPI journal article supplement (doi:10.3390/genes10050393), 2019-05-22

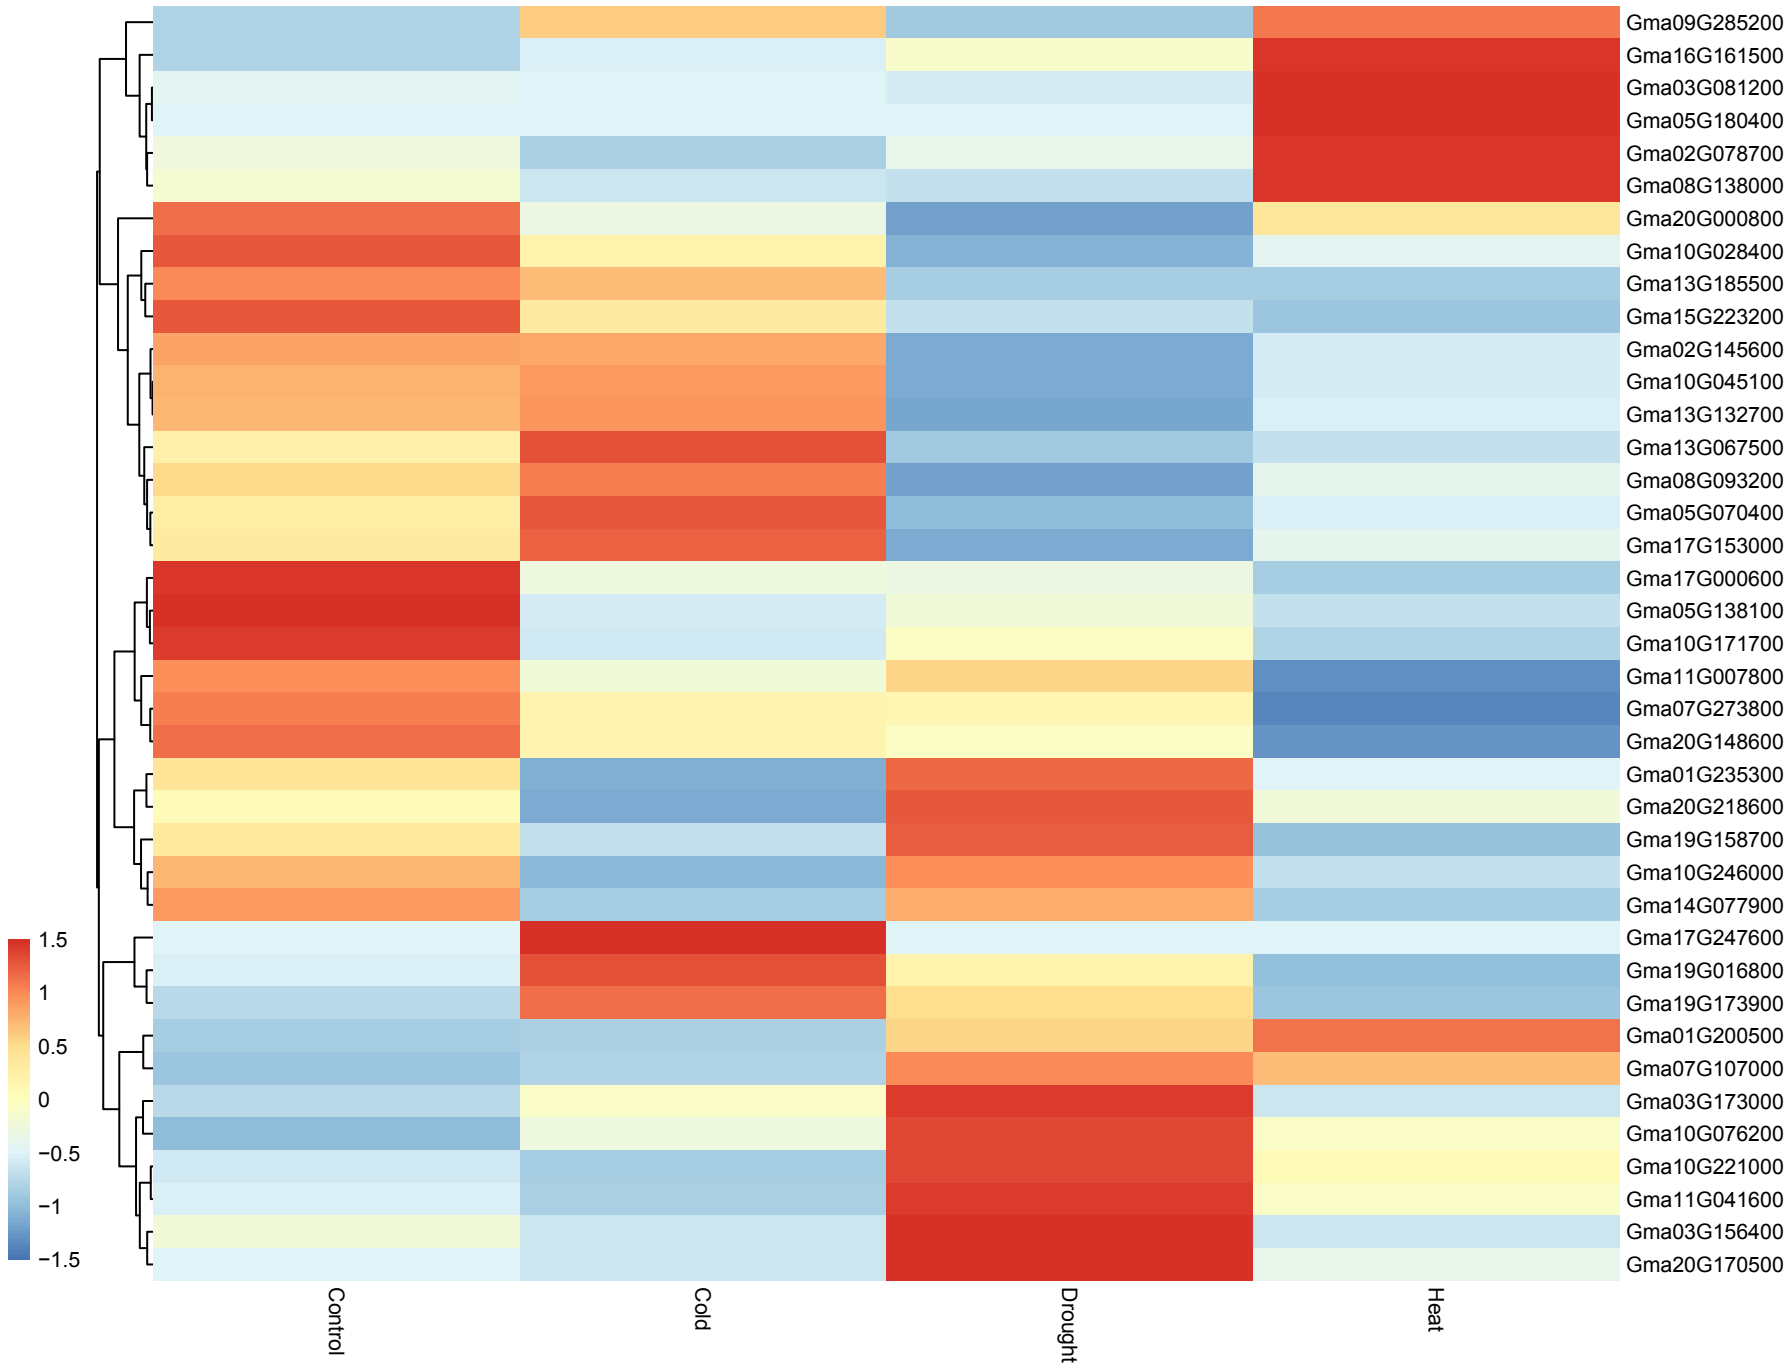

Supplement: s1 [file s1]

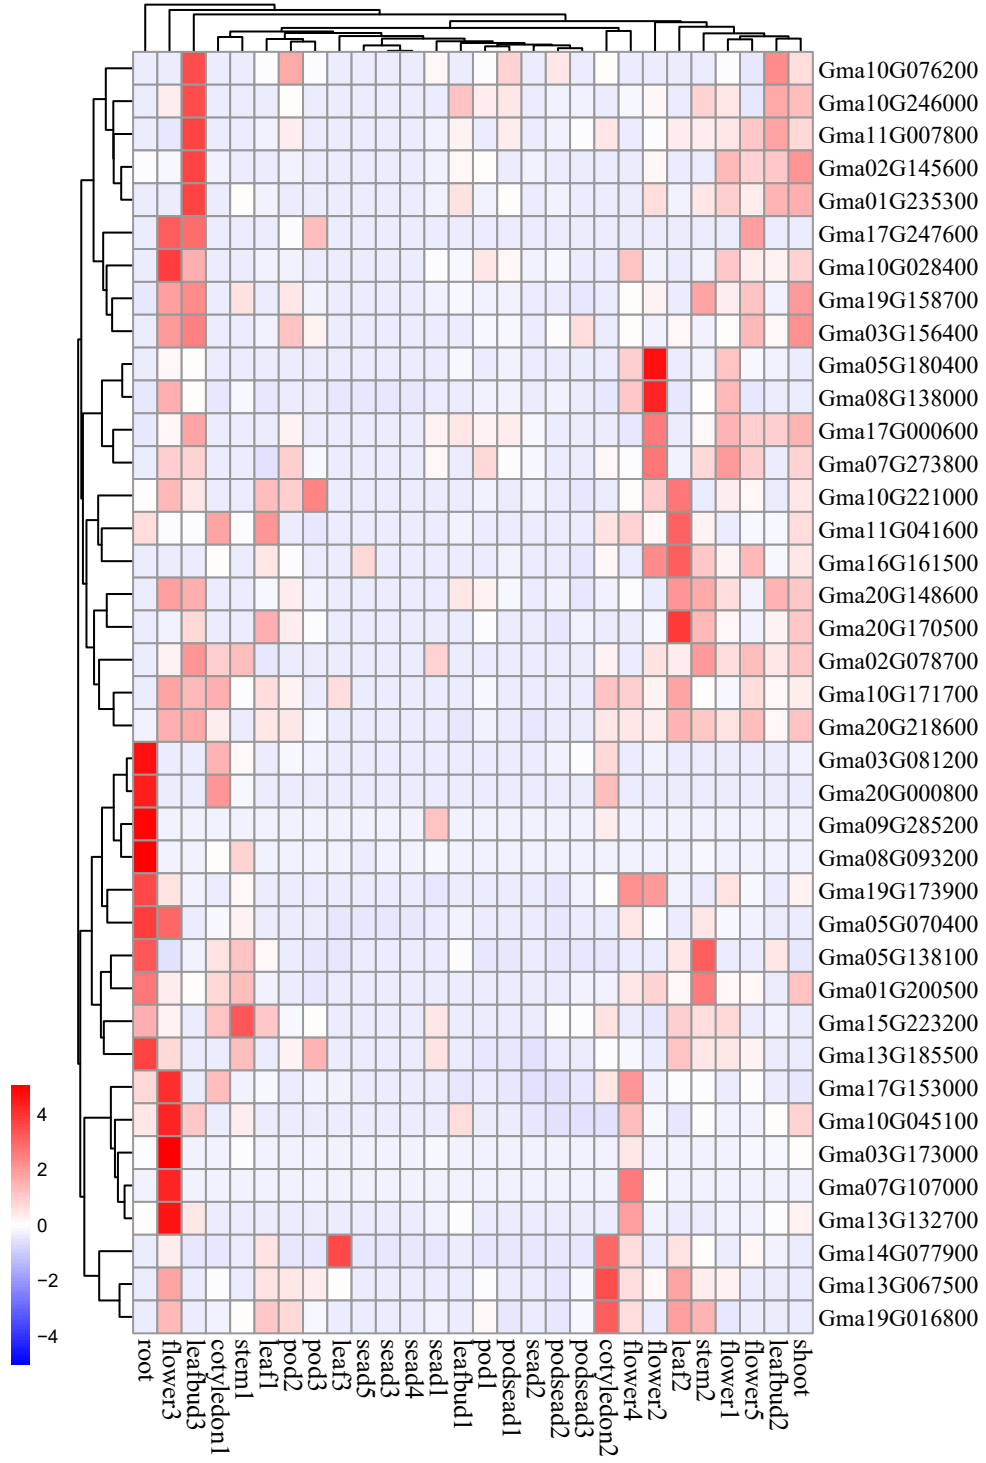

Supplement: s1 [file s1]
